# Supplementary material
Source: PubMed Central journal article supplement (PMC4445363)
Supplement: NIHMS545990-supplement-Table_S1.pdf [file NIHMS545990-supplement-Table_S1.pdf]

**Supplemental Table 1: Expression of Notch receptors and ligands in human normal, pre-neoplastic and neoplastic breast.**

|            | Normal (n=4) | HUT (n=5) | DCIS (n=27) | IDC (n=27) | ILC (n=14) |
|------------|--------------|-----------|-------------|------------|------------|
| Notch-1 N  | 3 (75)       | 1 (20)    | 9 (33)      | 0          | 0          |
| Notch-1 H  | 0            | 4 (80)    | 18 (67)     | 24 (89)    | 8 (57)     |
| Notch-1 L  | 1 (25)       | 0         | 0           | 3 (11)     | 6 (43)     |
| Notch-4 N  | 4 (100)      | 5 (100)   | 15 (56)     | 0          | 0          |
| Notch-4 H  | 0            | 0         | 0           | 22 (81)    | 13 (93)    |
| Notch-4 L  | 0            | 0         | 12 (44)     | 5 (19)     | 1 (7)      |
| Jagged-1 H | ND           | ND        | ND          | 21 (78)    | 9 (64)     |
| Jagged-1 L | ND           | ND        | ND          | 6 (22)     | 5 (36)     |
| Delta-1 H  | ND           | ND        | ND          | 6 (22)     | 5 (36)     |
| Delta-1 L  | ND           | ND        | ND          | 21 (78)    | 9 (64)     |
| p53        | ND           | ND        | 6 (22)      | ND         | ND         |
| ER         | ND           | ND        | 21          | 23 (86)    | 13 (93)    |
| PR         | ND           | ND        | ND          | 21 (78)    | 9 (64)     |
| Her2/Neu   | ND           | ND        | ND          | 7 (26)     | 2 (14)     |

Percent values are in parentheses. Abbreviations: N = negative; H = high intensity (3+); L = low intensity (1-2+); ER = estrogen receptor; PR = progesterone receptor; HUT = hyperplasia of usual type; DCIS = ductal carcinoma in situ; IDC = infiltrating ductal carcinoma; ILC = infiltrating lobular carcinoma.
