# Supplementary material
Source: PubMed Central journal article supplement (PMC4445363)

# Supplemental Figure 1

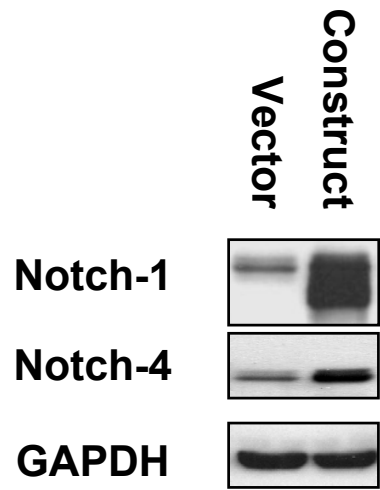

Supplement: NIHMS545990-supplement-Fig_S1.pdf [file NIHMS545990-supplement-Fig_S1.pdf]

# Supplemental Figure 2

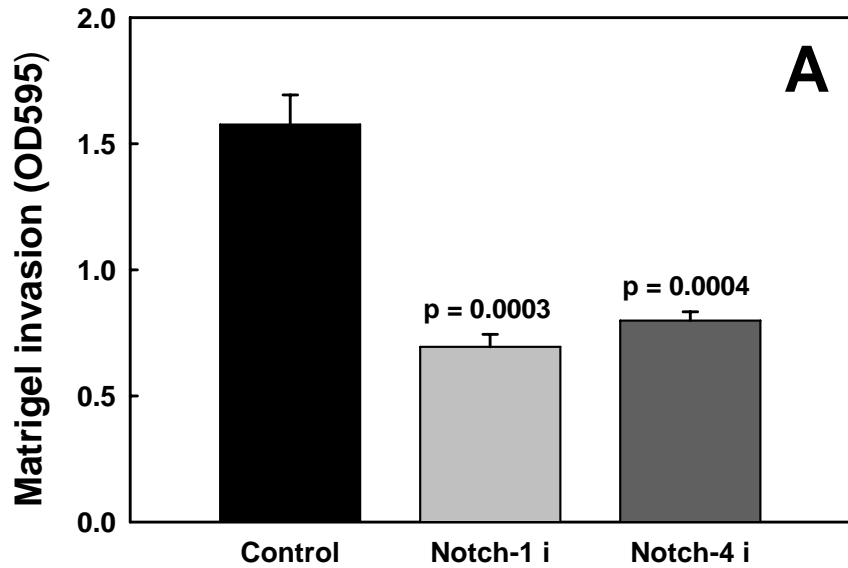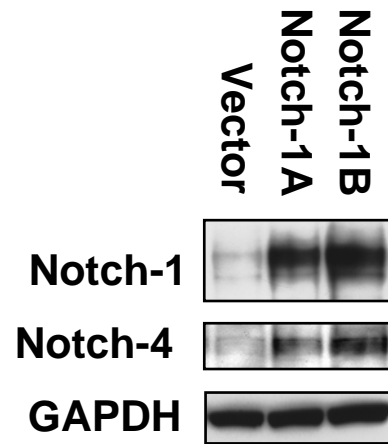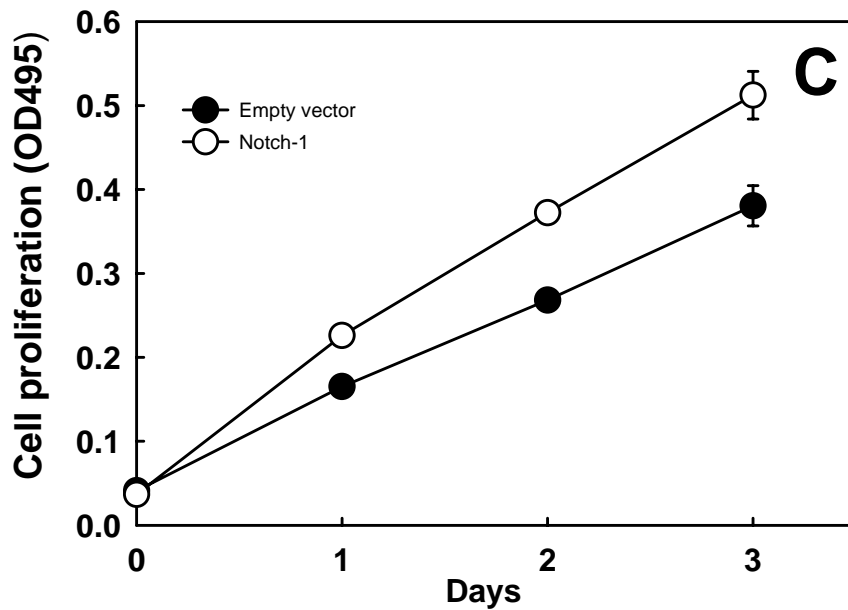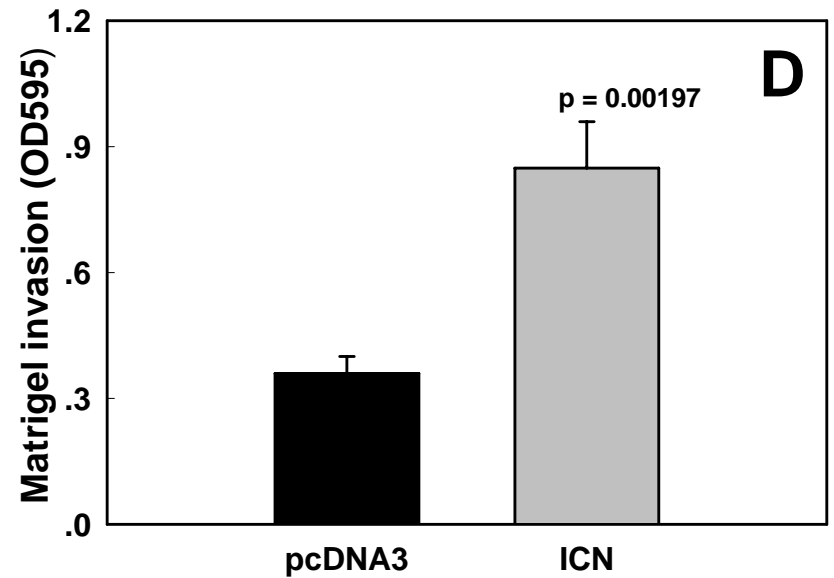

Supplement: NIHMS545990-supplement-Fig_S2.pdf [file NIHMS545990-supplement-Fig_S2.pdf]

# Supplemental Figure 3

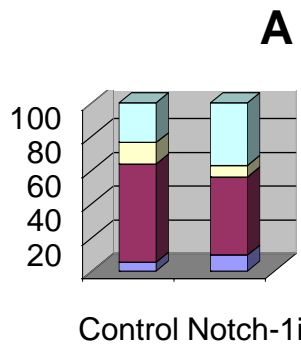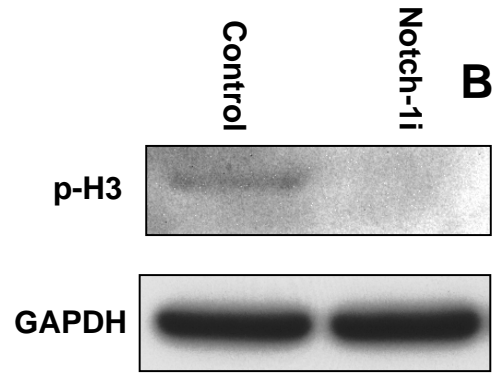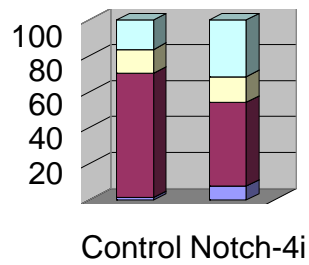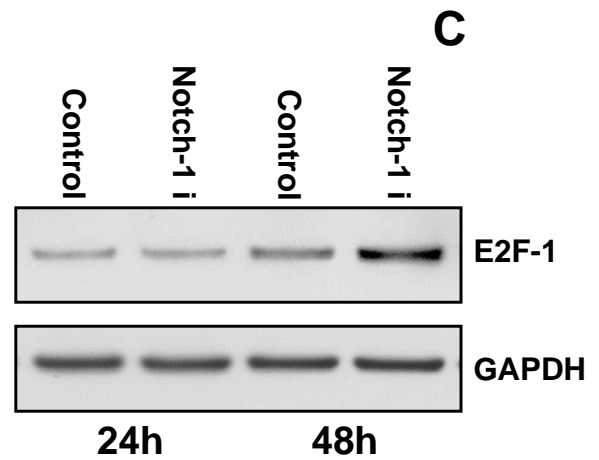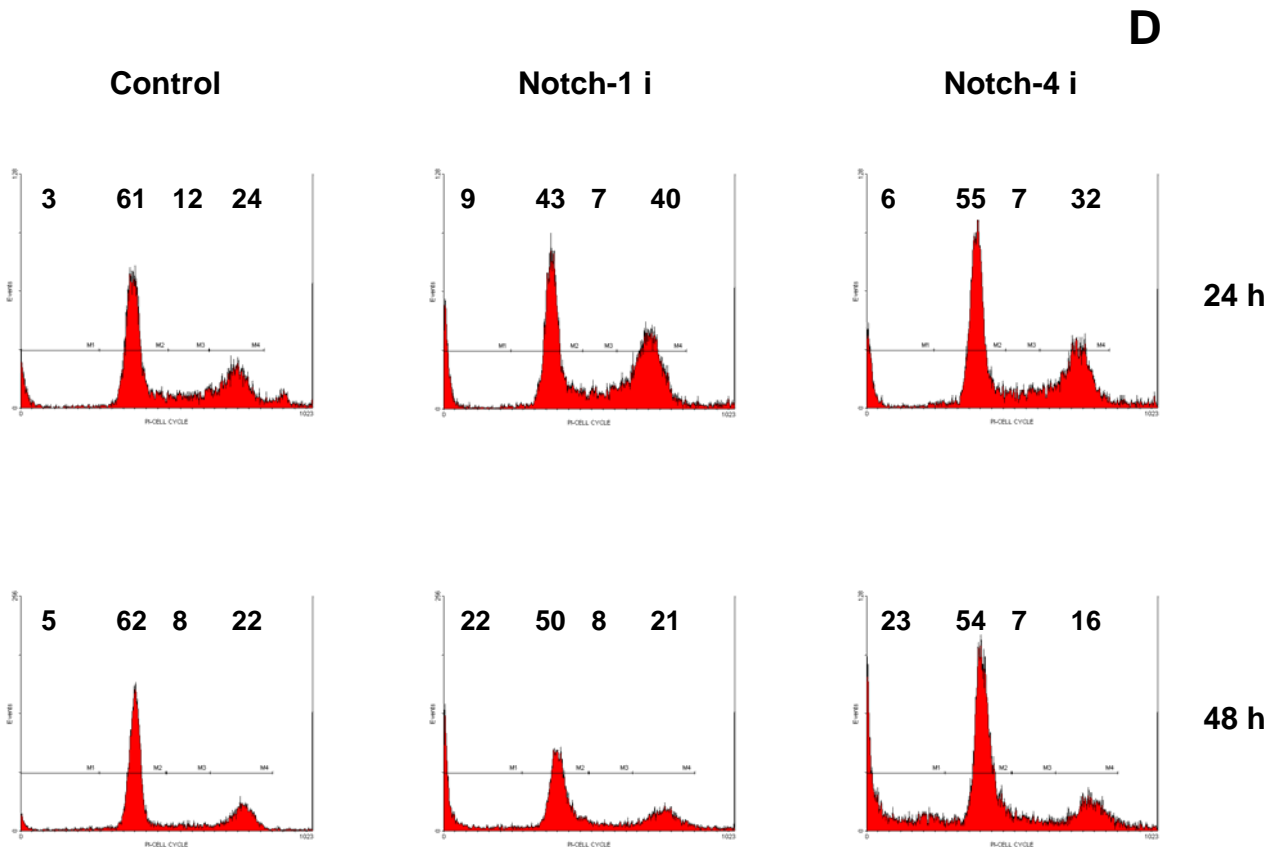

Supplement: NIHMS545990-supplement-Fig_S3.pdf [file NIHMS545990-supplement-Fig_S3.pdf]

# Supplemental Figure 4

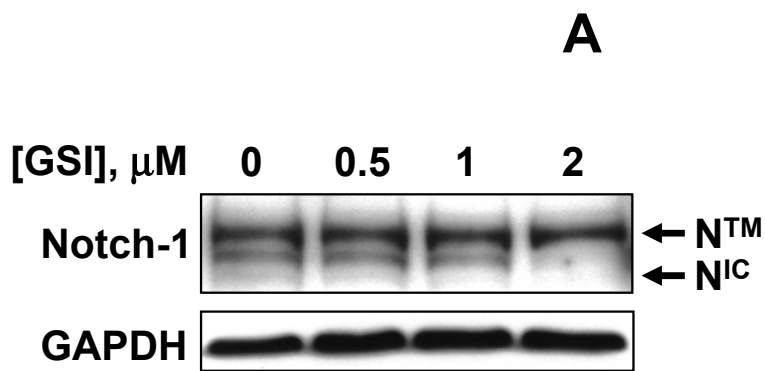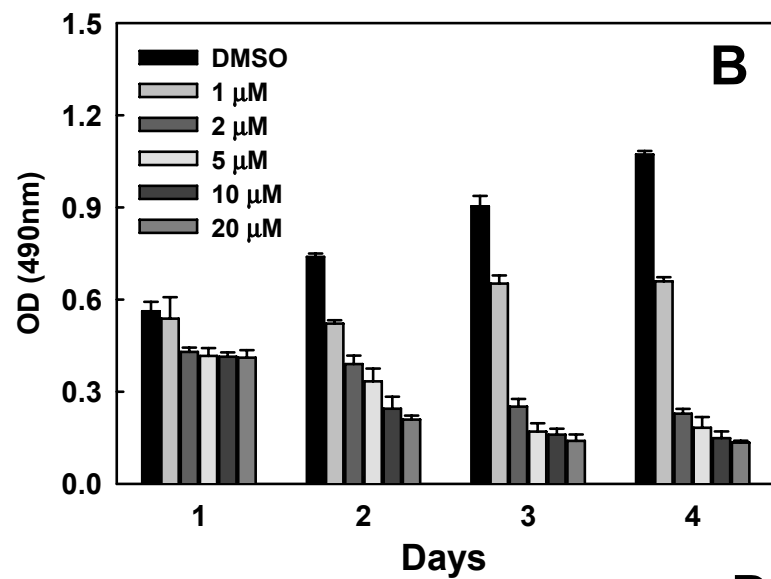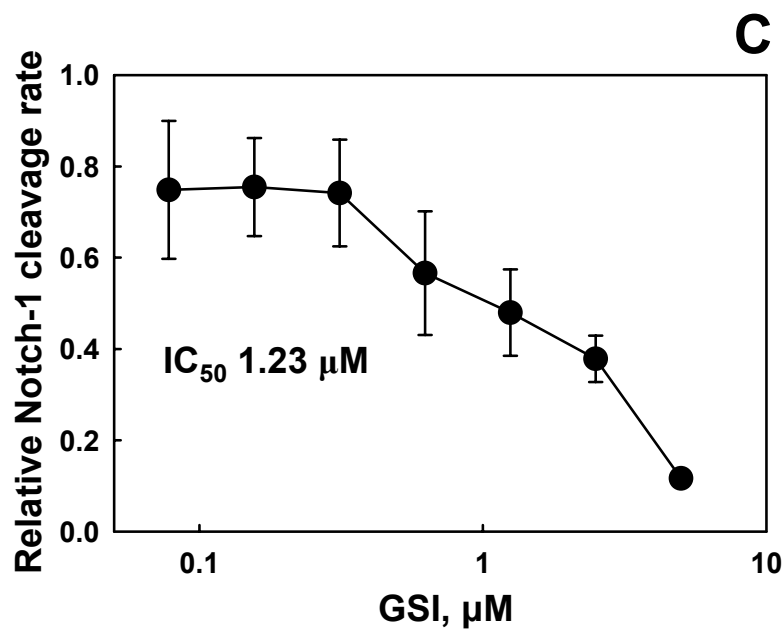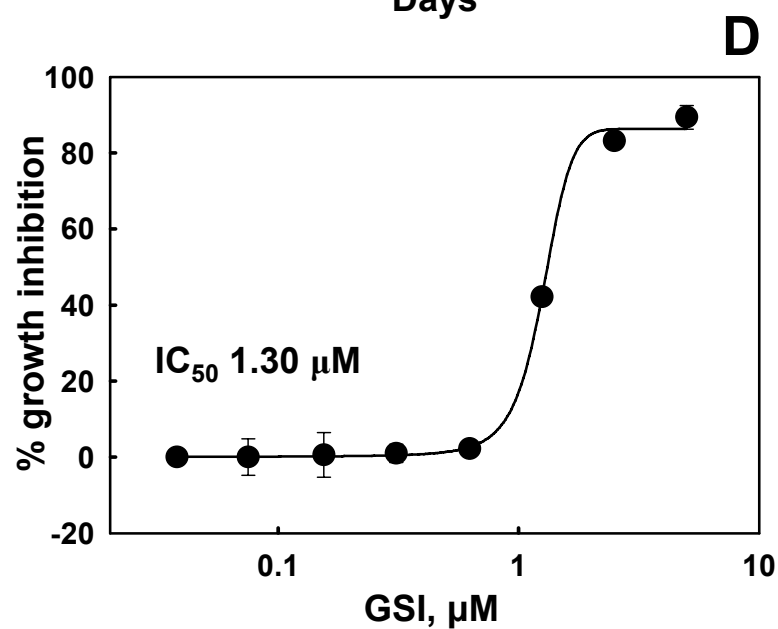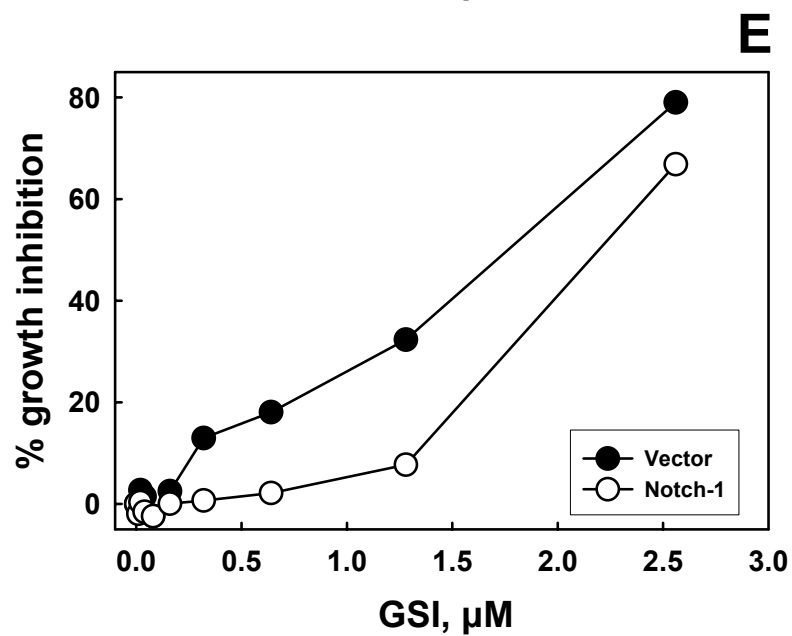

Supplement: NIHMS545990-supplement-Fig_S4.pdf [file NIHMS545990-supplement-Fig_S4.pdf]

Supplemental Figure 5

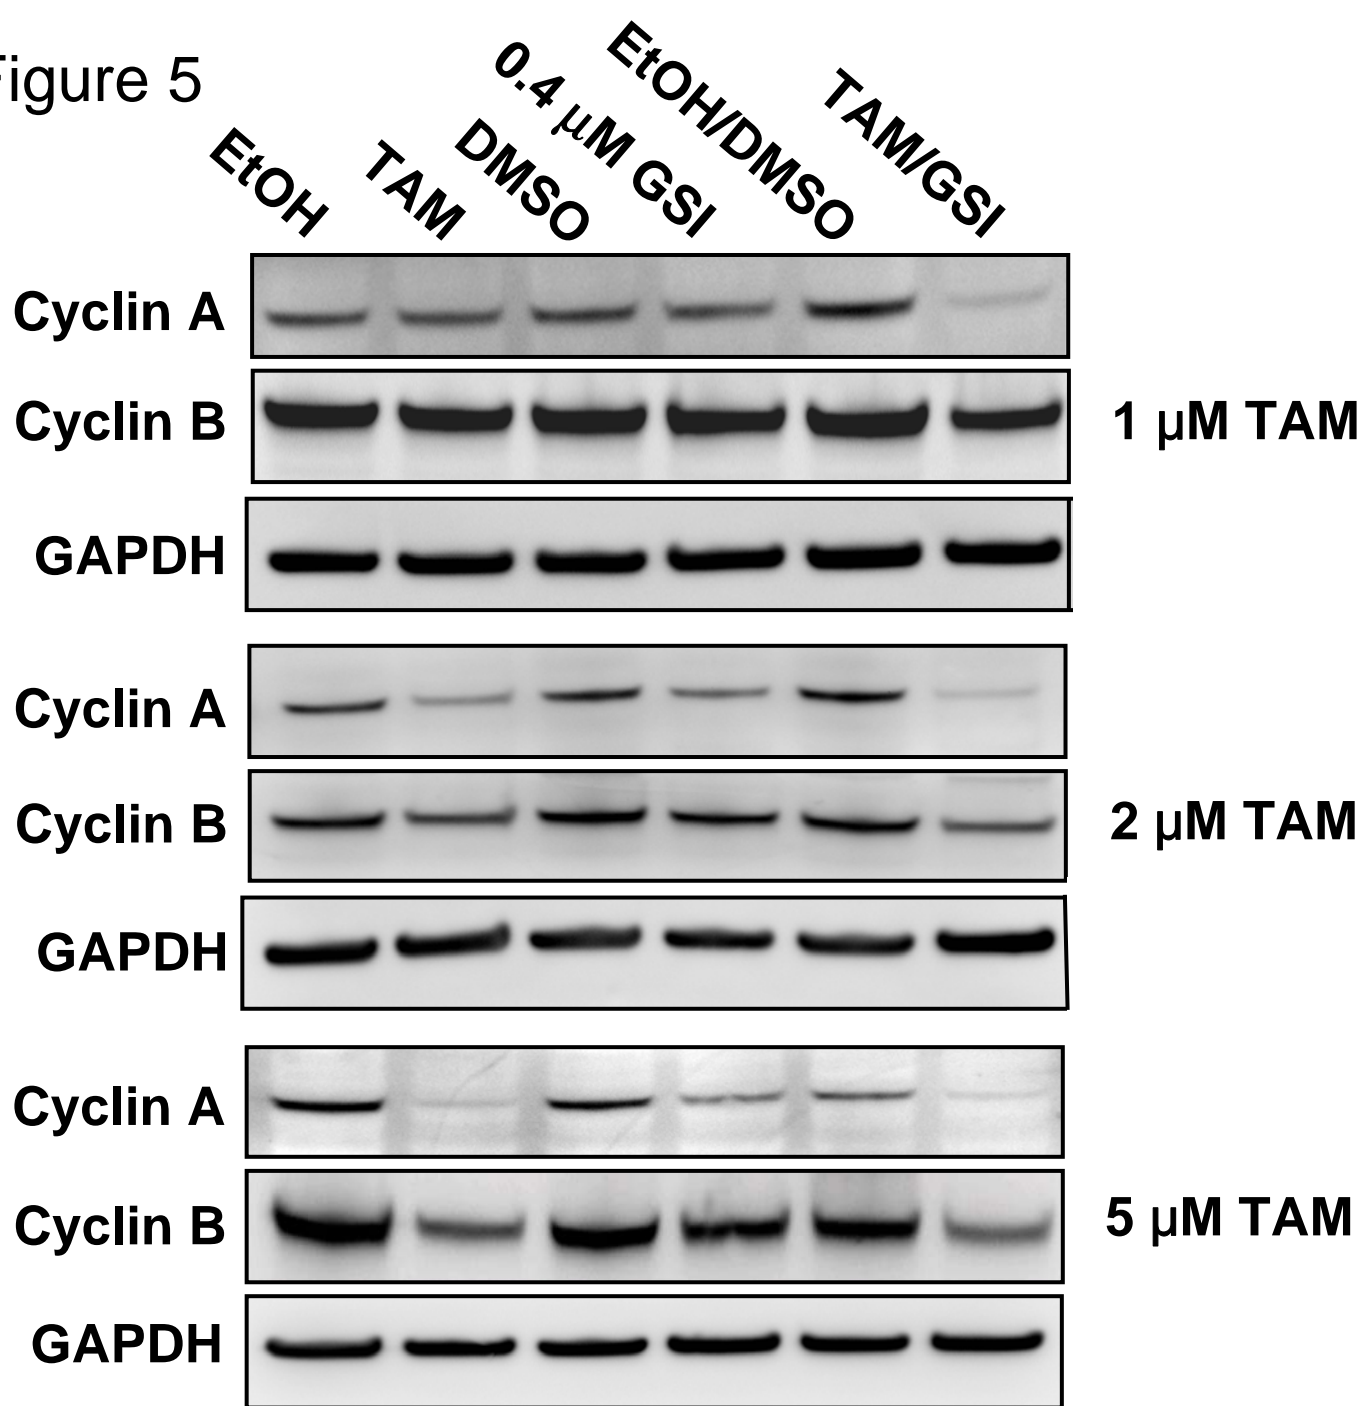

Supplement: NIHMS545990-supplement-Fig_S5.pdf [file NIHMS545990-supplement-Fig_S5.pdf]

# Supplemental Figure 6

**Notch-4 high**

**Notch-4 low**

**Notch-4**

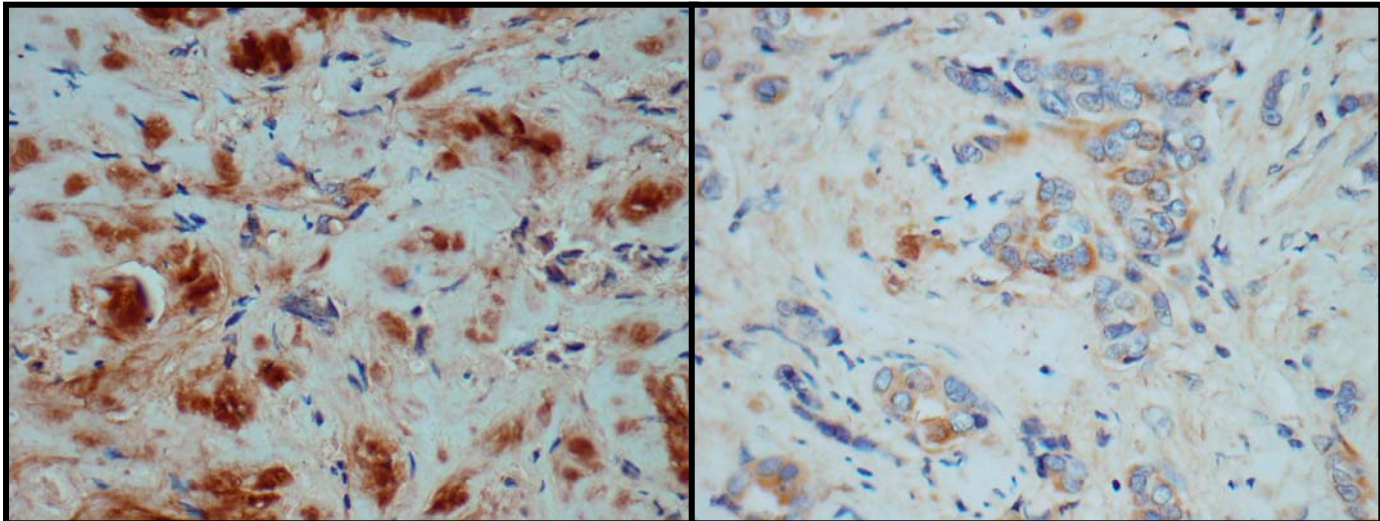

**Ki-67**

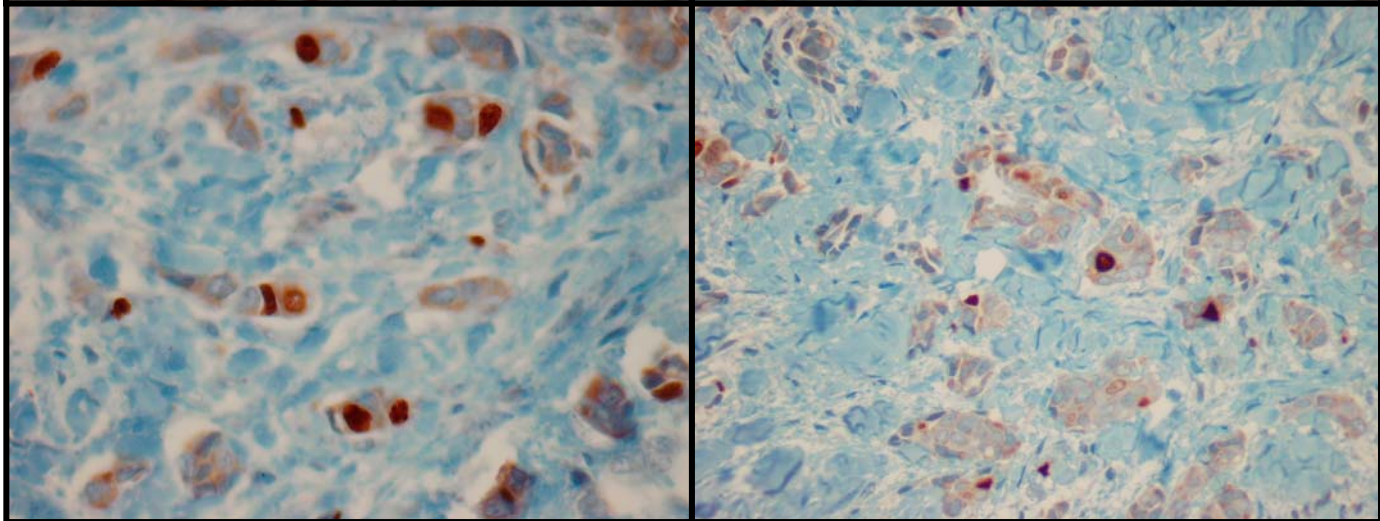

Supplement: NIHMS545990-supplement-Fig_S6.pdf [file NIHMS545990-supplement-Fig_S6.pdf]

Supplemental Figure 7

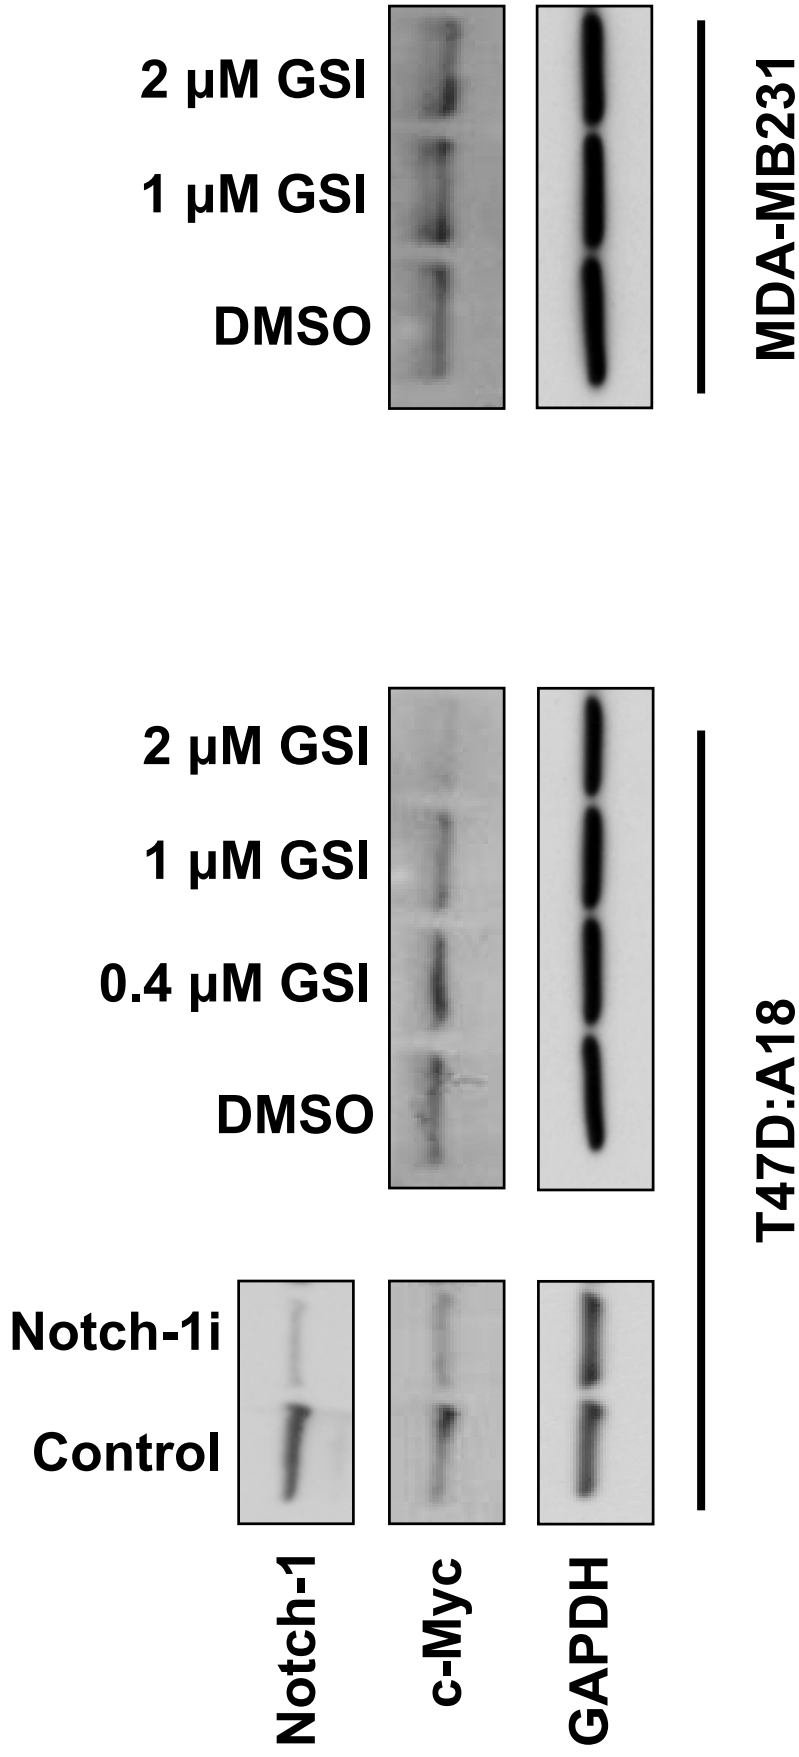

Supplement: NIHMS545990-supplement-Fig_S7.pdf [file NIHMS545990-supplement-Fig_S7.pdf]
